# Supplementary material for: Gonadal response after a single-dose stimulation test with recombinant human chorionic gonadotropin (rhCG) in patients with isolated prepubertal cryptorchidism
Source: PubMed Central journal article supplement (PMC5084384; doi:10.1186/s12610-016-0039-2), 2016-10-28
Supplement: 12610_2016_39_MOESM1_ESM.pdf [file 12610_2016_39_MOESM1_ESM.pdf]

Data of hormonal measurements at each time of the assessment

| Case | Type | Age<br>(years) | T       | T       | DHT     | DHT     | T/DHT | T/DHT | Andro | Andro | 17 OHP  | 17 OHP  | LH      | LH      | FSH     | FSH     | hCG     | AMH     | AMH     | Inibina B | Inibina B |
|------|------|----------------|---------|---------|---------|---------|-------|-------|-------|-------|---------|---------|---------|---------|---------|---------|---------|---------|---------|-----------|-----------|
|      |      |                | (ng/dl) | (ng/dl) | (ng/dl) | (ng/dl) | basal | peak  | basal | peak  | (ng/ml) | (ng/ml) | (ng/ml) | (ng/ml) | (mU/ml) | (mU/ml) | (mU/ml) | (mU/ml) | (mU/ml) | (ng/ml)   | (ng/ml)   |
|      |      |                | basal   | peak    | basal   | peak    | basal | peak  | basal | peak  | basal   | peak    | basal   | peak    | basal   | peak    | peak    | basal   | peak    | basal     | peak      |
| 1    | U    | 0,83           | 10      | 122,0   | 5,0     | 30,0    | 2,0   | 4,1   | 0,05  | 0,50  | 0,3     | 0,8     | 0,1     | 0,2     | 1,2     | 0,3     | 10,2    | 68,5    | 75,8    | 87,6      | 141,6     |
| 2    | U    | 0,91           | 10      | 186,0   | 5,0     | 21,0    | 2,0   | 8,9   | 0,20  | 0,10  | 0,3     | 0,3     | 0,1     | 0,1     | 0,3     | 0,1     | 14,1    | 47,9    | 86,9    | 65,0      | 79,3      |
| 3    | U    | 1,00           | 10      | 431,0   | 5,0     | na      | 2,0   | na    | 0,05  | 0,20  | 0,1     | na      | 0,1     | 0,1     | 0,2     | 0,1     | 32,2    | 103,3   | na      | 118,4     | na        |
| 4    | U    | 1,00           | 10      | 220,0   | 4,0     | 32,0    | 2,5   | 6,9   | 0,80  | 0,50  | 0,3     | 0,3     | 0,1     | 0,1     | 0,1     | 0,1     | 5,7     | 150,5   | 169,7   | 128,7     | 186,1     |
| 5    | U    | 1,00           | 10      | 433,0   | 6,0     | 44,0    | 1,6   | 9,8   | 0,05  | 0,05  | 0,2     | 0,3     | 0,1     | 0,9     | 0,8     | 0,1     | 48,3    | 163,7   | 149,6   | 101,0     | 93,6      |
| 6    | U    | 1,08           | 10      | 442,0   | 4,0     | 90,0    | 2,5   | 4,9   | 0,30  | 0,10  | 0,2     | 1,0     | 0,1     | 0,1     | 0,4     | 0,1     | 20,8    | 147,7   | 235,0   | 160,7     | 242,6     |
| 7    | U    | 1,08           | 10      | 334,0   | 4,0     | 49,0    | 2,5   | 6,8   | 0,05  | 0,05  | 0,4     | 0,6     | 0,1     | 0,2     | 0,4     | 0,1     | 10,4    | 180,4   | 168,9   | 100,8     | 123,2     |
| 8    | U    | 1,08           | 10      | 298,0   | 6,0     | 65,0    | 1,6   | 4,6   | 0,15  | 0,15  | 0,2     | 0,3     | 0,1     | 0,1     | 0,7     | 0,1     | 6,2     | 259,8   | 266,6   | 213,7     | 221,2     |
| 9    | U    | 1,08           | 10      | 547,0   | 4,0     | 55,0    | 2,5   | 9,9   | 0,10  | 0,80  | 0,2     | 1,2     | 0,3     | 0,1     | 0,1     | 0,1     | 21,2    | 238,9   | 240,8   | 348,4     | 266,3     |
| 10   | U    | 1,66           | 10      | 294,0   | 5,0     | na      | 2,0   | na    | 0,05  | 0,60  | 0,1     | 2,0     | 0,2     | 0,1     | 0,3     | 0,1     | 18,2    | 111,7   | na      | 119,5     | na        |
| 11   | U    | 2,33           | 10      | 145,0   | 4,0     | na      | 2,5   | na    | 0,50  | 0,10  | 0,8     | 0,5     | 0,1     | 0,2     | 0,3     | 0,4     | 29,0    | 102,9   | na      | 51,0      | na        |
| 12   | U    | 2,50           | 10      | 168,0   | 4,0     | 45,0    | 2,5   | 3,7   | 0,05  | 0,10  | 0,2     | 0,6     | 0,2     | 0,1     | 1,0     | 0,2     | 22,4    | 97,1    | 168,2   | 96,3      | 128,8     |
| 13   | U    | 2,75           | 10      | 123,0   | 5,0     | 37,0    | 2,0   | 3,3   | 0,15  | 0,60  | 0,5     | 0,7     | 0,2     | 0,2     | 0,9     | 0,2     | 19,2    | 97,5    | 142,5   | 119,7     | 131,8     |
| 14   | U    | 2,83           | 10      | 112,0   | 5,0     | 14,0    | 2,0   | 8,0   | 0,05  | 0,15  | 1,0     | 1,0     | 0,1     | 0,1     | 0,5     | 0,4     | 10,1    | 49,8    | 93,3    | 40,6      | 69,7      |
| 15   | U    | 3,00           | 10      | 318,0   | 4,0     | 22,0    | 2,5   | 14,5  | 0,15  | 0,30  | 0,2     | 0,6     | 0,1     | 0,1     | 1,2     | 0,2     | 17,4    | 148,4   | 231,8   | 118,3     | 165,4     |
| 16   | U    | 3,08           | 10      | 179,0   | 5,0     | 30,0    | 2,0   | 6,0   | 0,10  | 0,30  | 1,5     | 0,4     | 0,1     | 0,1     | 0,3     | 0,2     | 10,7    | 93,4    | 291,4   | 77,4      | 114,0     |
| 17   | U    | 4,00           | 10      | 310,0   | 5,0     | 39,0    | 2,0   | 7,9   | 0,15  | 0,20  | 0,5     | 0,9     | 0,1     | 0,2     | 0,6     | 0,1     | 21,6    | 118,2   | 173,4   | 76,6      | 127,1     |
| 18   | U    | 4,83           | 10      | 197,0   | 4,0     | 18,0    | 2,5   | 10,9  | 0,15  | 0,40  | 0,3     | 0,4     | 0,2     | 0,1     | 0,5     | 0,1     | 13,3    | 168,6   | 227,6   | 135,4     | 144,5     |
| 19   | U    | 5,00           | 10      | 111,0   | 4,0     | 13,0    | 2,5   | 8,5   | 0,05  | 0,05  | 0,2     | 0,5     | 0,2     | 0,2     | 0,8     | na      | 6,5     | 82,4    | 153,1   | 50,5      | 111,4     |
| 20   | U    | 5,00           | 10      | 139,0   | 4,0     | 18,0    | 2,5   | 7,7   | 0,30  | 0,40  | 0,3     | 0,6     | 0,1     | 0,1     | 0,3     | 0,1     | 18,4    | 52,3    | 86,4    | 42,4      | 63,3      |
| 21   | U    | 6,41           | 10      | 392,0   | 4,0     | 21,0    | 2,5   | 18,7  | 0,05  | 0,40  | 1,1     | 1,1     | 0,2     | 0,1     | 1,4     | 0,4     | 6,6     | 77,2    | 65,2    | 78,7      | 89,8      |
| 22   | U    | 7,00           | 10      | 99,0    | 6,0     | 16,0    | 1,6   | 6,2   | 0,05  | 0,20  | 0,8     | 0,9     | 0,1     | 0,1     | 0,2     | 0,2     | 9,2     | 63,6    | 101,5   | 52,3      | 55,8      |
| 23   | U    | 9,00           | 10      | 312,0   | na      | 28,0    | na    | 11,1  | 0,05  | 0,70  | 0,6     | 1,0     | 0,1     | 0,1     | 0,6     | 0,1     | 11,6    | 70,5    | 206,0   | 32,7      | 143,1     |
| 24   | U    | 9,00           | 10      | 174,0   | 5,0     | 27,0    | 2,0   | 6,4   | 0,10  | 0,30  | 0,9     | 2,1     | 0,2     | 0,2     | 0,8     | 0,2     | 13,4    | 96,0    | 199,3   | 78,2      | 168,5     |
| 25   | B    | 0,75           | 10      | 525,0   | 3,0     | 50,0    | 3,3   | 10,5  | 0,10  | 0,15  | 0,1     | 0,6     | 0,4     | 0,1     | 1,3     | 0,1     | 7,3     | 124,1   | 109,0   | 205,1     | 175,0     |
| 26   | B    | 0,75           | 10      | 315,0   | 4,0     | 31,0    | 2,5   | 10,2  | 0,30  | 0,10  | 0,5     | 0,5     | 0,1     | 0,1     | 0,2     | 0,1     | 9,6     | 66,8    | 104,4   | 144,6     | 193,8     |
| 27   | B    | 0,83           | 10      | 315,0   | 5,0     | 26,0    | 2,0   | 12,1  | 0,05  | 0,50  | 0,2     | 0,9     | 0,3     | 0,1     | 1,4     | 0,1     | 12,7    | 83,9    | 67,5    | 162,7     | 130,6     |
| 28   | B    | 1,00           | 10      | 129,0   | 4,0     | 31,0    | 2,5   | 4,2   | 0,10  | 0,60  | 0,2     | 0,4     | 0,1     | 0,1     | 1,0     | 0,5     | 12,0    | 54,3    | 76,3    | 82,1      | 82,0      |
| 29   | B    | 5,00           | 10      | 51,0    | 4,0     | 9,0     | 2,5   | 5,7   | 0,05  | 0,15  | 0,4     | 0,5     | 0,1     | 0,1     | 0,5     | 0,3     | 4,5     | 61,6    | 119,8   | 29,2      | 49,6      |
| 30   | B    | 7,25           | 10      | 61,0    | 6,0     | 11,0    | 1,6   | 5,5   | 0,40  | 0,40  | 0,5     | 0,3     | 0,1     | 0,1     | 0,9     | 0,2     | 6,4     | 84,2    | 100,8   | 48,9      | 64,4      |
| 31   | B    | 9,00           | 10      | 200,0   | 4,0     | 32,0    | 2,5   | 6,3   | 2,10  | 0,50  | 0,3     | 0,9     | 0,2     | 0,1     | 0,9     | 0,1     | 39,1    | 127,4   | 169,4   | 113,1     | 144,0     |

hCG: human chorionic gonadotropin; basal: basal levels; peak: peak levels obtained 7 days after a subcutaneous single dose of recombinant hCG (rhCG, Ovidrel® 250 mcg); U: unilateral; B: bilateral; na: not applicable; T: testosterone; DHT: dehydrotestosterone; Andro: androstenedione; 17 OHP: 17-hydroxiprogesterone; LH: luteinizing hormone; FSH: follicle stimulating hormone.
